# Supplementary material
Source: PubMed Central journal article supplement (PMC9157563)

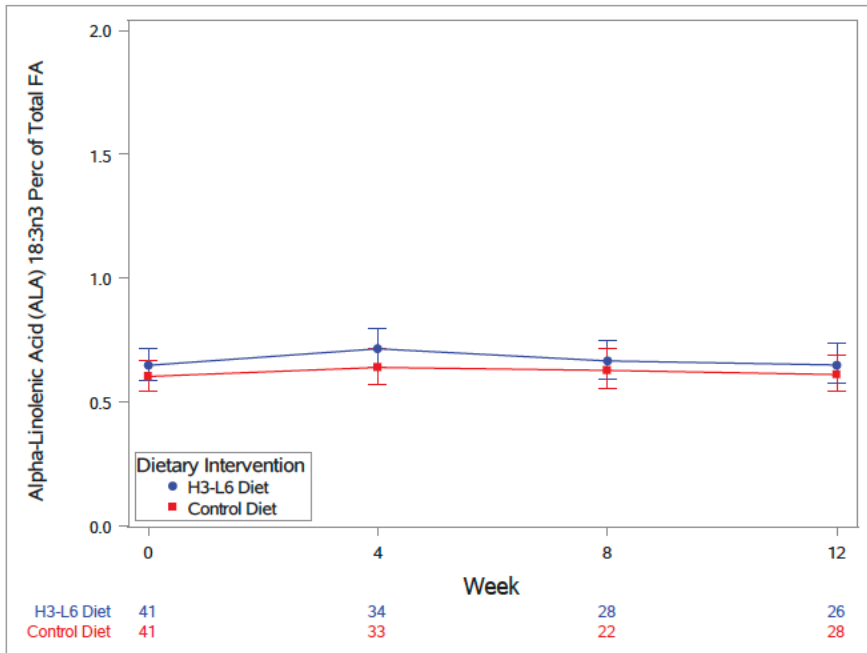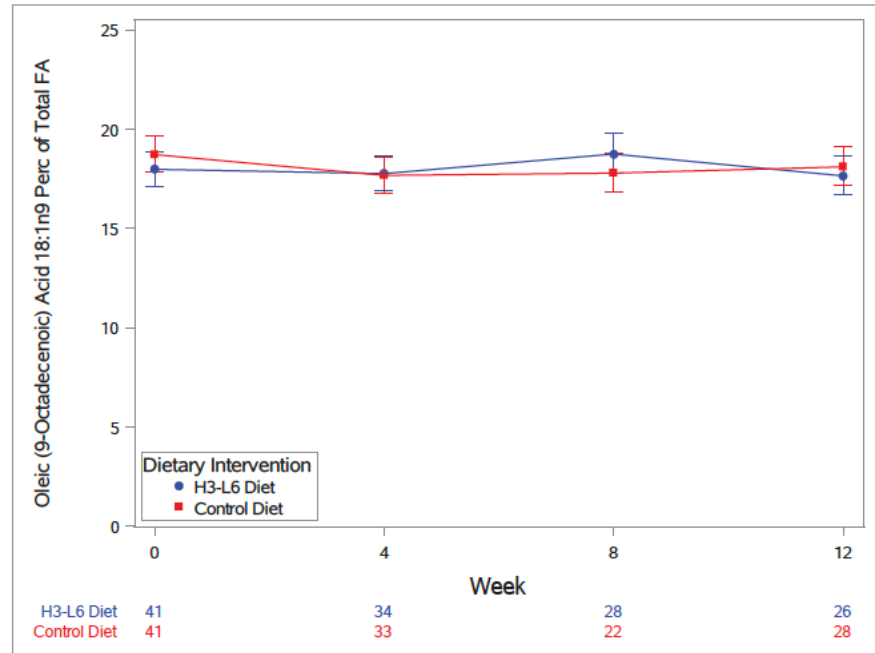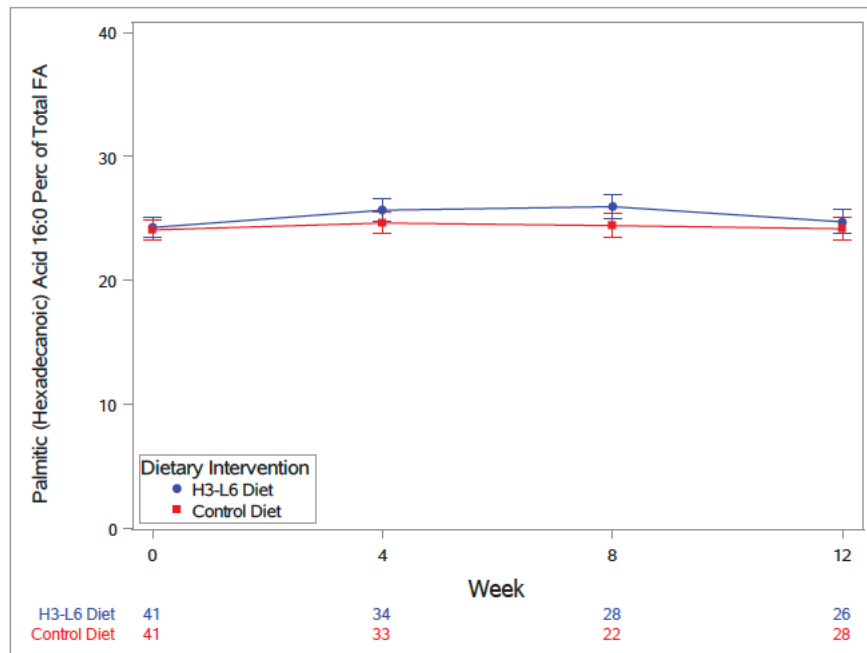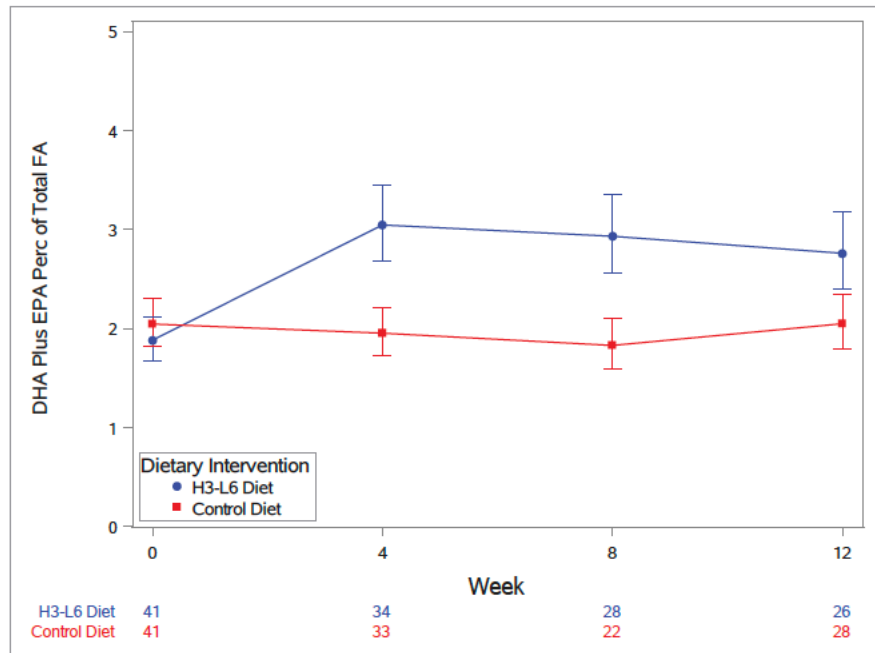

Supplement: NIHMS1807007-supplement-supplementary_Figure.pdf [file NIHMS1807007-supplement-supplementary_Figure.pdf]
